# Supplementary material for: Cobalt(ii), nickel(ii), manganese(ii) and zinc(ii) metal–organic frameworks constructed with the newly designed 2-(pyridin-4-yl)-4,6-pyrimidine dicarboxylic acid ligand: syntheses, crystal structures and properties
Source: Royal Society of Chemistry journal article supplement (doi:10.1039/c3ce00068k), 2013-01-01
Supplement: c3ce00068k.pdf [file c3ce00068k.pdf]

## Supporting Information

**Cobalt(II), nickel(II), manganese(II) and zinc(II) metal–organic  
frameworks Constructed with the newly designed  
2-(Pyridin-4-yl)-4,6-Pyrimidine Dicarboxylic Acid Ligand:  
Syntheses, Crystal Structures and Properties**

Baoming Ji,<sup>\*</sup> Dongsheng Deng, Lufang Ma, Hongliang Li, Xuesen Fan, Guirong Qu,  
Lei Cao, Le Zhou

College of Chemistry and Chemical Engineering, Luoyang Normal University,  
Luoyang 471022, People's Republic of Ch

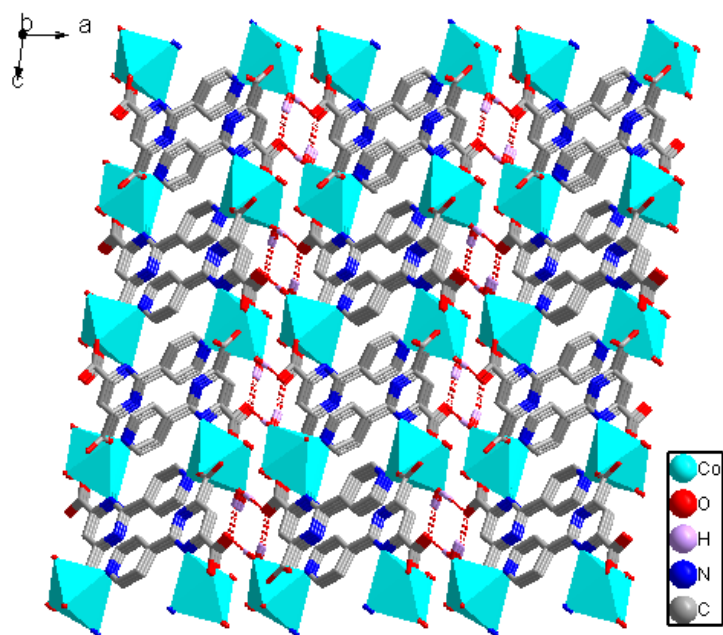

**Figure S1.** View of a 3D net in **1** looking along the *b* axis.

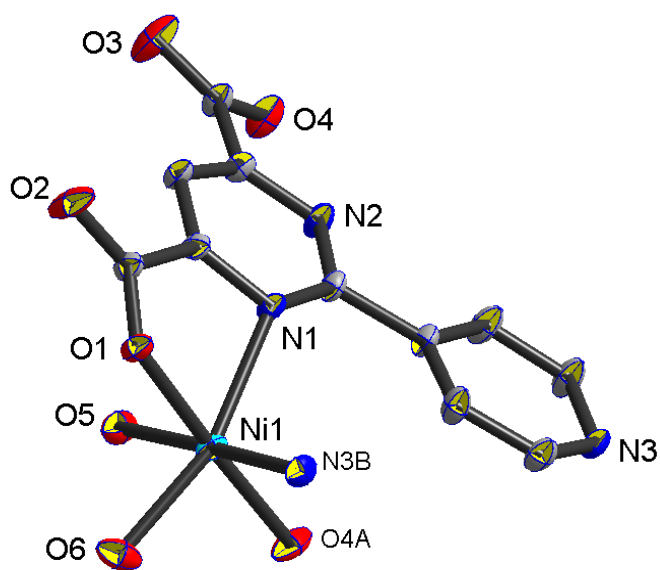

**Figure S2.** View of the coordination environment of the Ni1 center in **2** with a labeling scheme and 30% thermal ellipsoids.

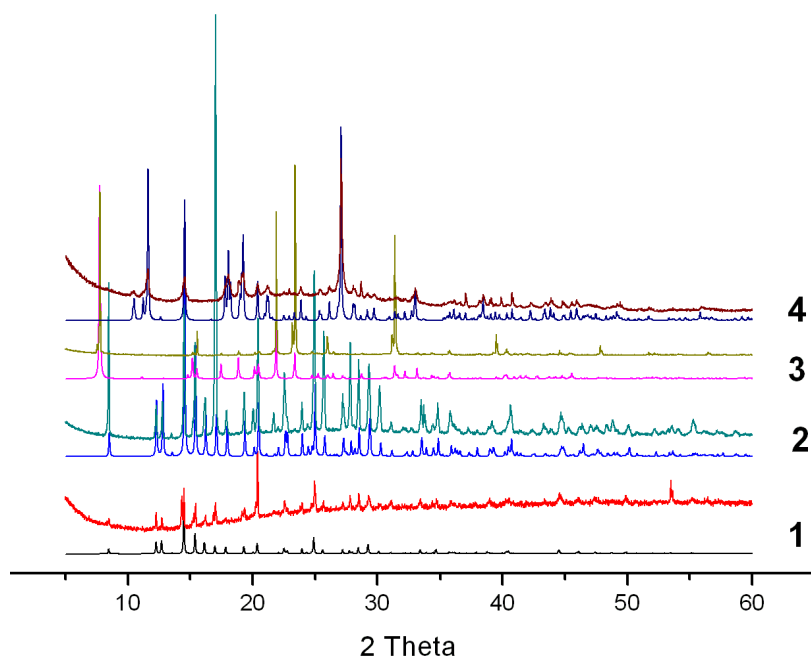

**Figure S3.** Comparison of the experimental and simulated PXRD patterns. In each group, the top is the experimental pattern and the bottom is the simulated one.
